# Supplementary material
Source: publisher figshare collection journal article supplement (https://tandf.figshare.com/ndownloader/files/21960861)
Supplement: Supplementary file 1 [file 21960861]

**Table1S. ANOVA table of the** indicators in the study.

| Factor |  | Mean square | | | | | F value |  |  |  |  |
| --- | --- | --- | --- | --- | --- | --- | --- | --- | --- | --- | --- |
|  | No. | Block  (B) | Hybrids (H) | B×H | Density (D) | D×H | Block  (B) | Hybrids (H) | B×H | Density (D) | D×H |
| DF |  | 2 | 5 | 10 | 2 | 10 | 2 | 5 | 10 | 2 | 10 |
| Stem dry weight per length: g cm-1 | 1st | 0.05 | 0.15 | 0.02 | 1.75 | 0.01 | 2.36ns | 7.78** | 2.46ns | 223.22** | 0.81ns |
|  | 2nd | 0.00 | 0.11 | 0.00 | 0.81 | 0.00 | 0.37ns | 44.88** | 2.27ns | 747.84** | 3.29** |
|  | 3rd | 0.01 | 0.06 | 0.00 | 1.00 | 0.01 | 0.81ns | 93.68** | 0.54ns | 799.07** | 5.31** |
|  | 4th | 0.00 | 0.05 | 0.00 | 0.37 | 0.00 | 1.19ns | 25.31** | 1.71ns | 301.91** | 1.27ns |
|  | 5th | 0.00 | 0.05 | 0.00 | 0.25 | 0.00 | 1.14ns | 60.57** | 0.95ns | 286.96** | 3.23** |
| Stem rind puncture strength: N | 1st | 33.37 | 436.63 | 10.81 | 774.98 | 13.32 | 3.09ns | 40.39** | 1.67ns | 119.81** | 2.06ns |
|  | 2nd | 0.05 | 594.71 | 10.21 | 2013.50 | 10.69 | 0.01ns | 58.27** | 0.95ns | 186.79** | 0.99ns |
|  | 3rd | 1.60 | 378.13 | 6.86 | 2033.31 | 8.78 | 0.23ns | 55.14** | 0.46ns | 137.66** | 0.59ns |
|  | 4th | 12.65 | 504.38 | 14.19 | 2483.48 | 49.19 | 0.89ns | 35.55** | 1.32ns | 231.33** | 4.58** |
|  | 5th | 7.51 | 521.89 | 4.87 | 1745.05 | 85.97 | 1.54ns | 107.21** | 0.25ns | 90.55** | 4.46** |
| Stem crushing strength: kg | 1st | 31.57 | 176.18 | 11.79 | 3201.86 | 21.19 | 2.68ns | 14.95** | 0.74ns | 202.01** | 1.34ns |
|  | 2nd | 8.25 | 456.54 | 7.75 | 2120.20 | 8.35 | 1.06ns | 58.92** | 0.53ns | 145.42** | 0.57ns |
|  | 3rd | 26.20 | 256.86 | 9.33 | 5789.63 | 17.59 | 2.81ns | 27.53** | 1.19ns | 736.92** | 2.24ns |
|  | 4rd | 42.45 | 223.88 | 9.96 | 1966.02 | 21.79 | 4.26ns | 22.49** | 1.30ns | 256.82** | 2.85* |
|  | 5th | 3.78 | 238.74 | 6.68 | 1547.62 | 14.70 | 0.57ns | 35.74** | 1.29ns | 299.38** | 2.84* |
| Stem bending strength: N | 3rd | 9.88 | 1167.44 | 13.56 | 4998.12 | 42.50 | 0.73ns | 86.08** | 1.95ns | 720.13** | 6.12** |
|  | 4rd | 49.59 | 549.06 | 14.56 | 2601.01 | 15.45 | 3.41ns | 37.71** | 1.44ns | 256.66** | 1.52ns |
|  | 5th | 23.10 | 196.33 | 12.58 | 1086.61 | 20.30 | 1.84ns | 15.61** | 2.37ns | 204.57** | 3.82** |

Block, Hybrids and Density are abbreviated B, H and D, respectively, in the interaction terms. ns: not significant (P>0.05); *, **: significant at P < 0.05 and P < 0.01, respectively.

**Supplementary information**

**Figure 1S. Accumulated rainfall (mm) and average temperature (T, °C) every 10 days during maize growth season in 2016 and 2017.**

**Figure 2S. Genotypic difference in stem dry weight per length of the 1st, 2nd, 3rd, 4th, 5th node in response to plant density across two experimental years.** Bars denote the SE of the mean (n=3). Different lowercase letters represent significant differences among hybrids under the same planting density (P < 0.05). Different capital letters represent significant differences among planting densities across all the hybrids (P < 0.05).

**Figure 3S. Genotypic difference in rind penetration strength of the 1st, 2nd, 3rd, 4th, 5th node in response to plant density across two experimental years.** Bars denote the SE of the mean (n=3). Different lowercase letters represent significant differences among hybrids under the same planting density (P < 0.05). Different capital letters represent significant differences among planting densities across all the hybrids (P < 0.05).

**Figure 4S. Genotypic difference in stem crushing strength of the 1st, 2nd, 3rd, 4th, 5th node in response to plant density across two experimental years.** Bars denote the SE of the mean (n=3). Different lowercase letters represent significant differences among hybrids under the same planting density (P < 0.05). Different capital letters represent significant differences among planting densities across all the hybrids (P < 0.05).

**Figure 5S. Genotypic difference in stem bending strength of the 3rd, 4th, 5th node in response to plant density across two experimental years.** Bars denote the SE of the mean (n=3). Different lowercase letters represent significant differences among hybrids under the same planting density (P < 0.05). Different capital letters represent significant differences among planting densities across all the hybrids (P < 0.05).

**Figure 6S. Genotypic differences in plant height, ear height to plant height ratio at three plant densities for two experimental years.** Bars denote the SE of the mean (n=3). Different lowercase letters represent significant differences among hybrids under the same planting density (P < 0.05). Different capital letters represent significant differences among planting densities across all the hybrids (P < 0.05).


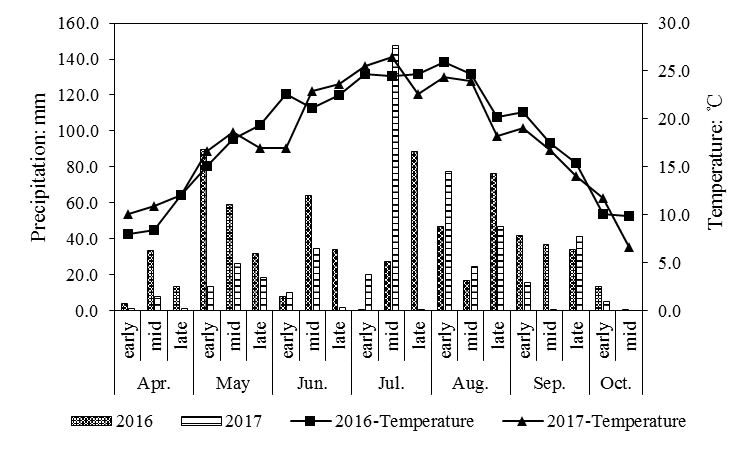


**Figure 1S**


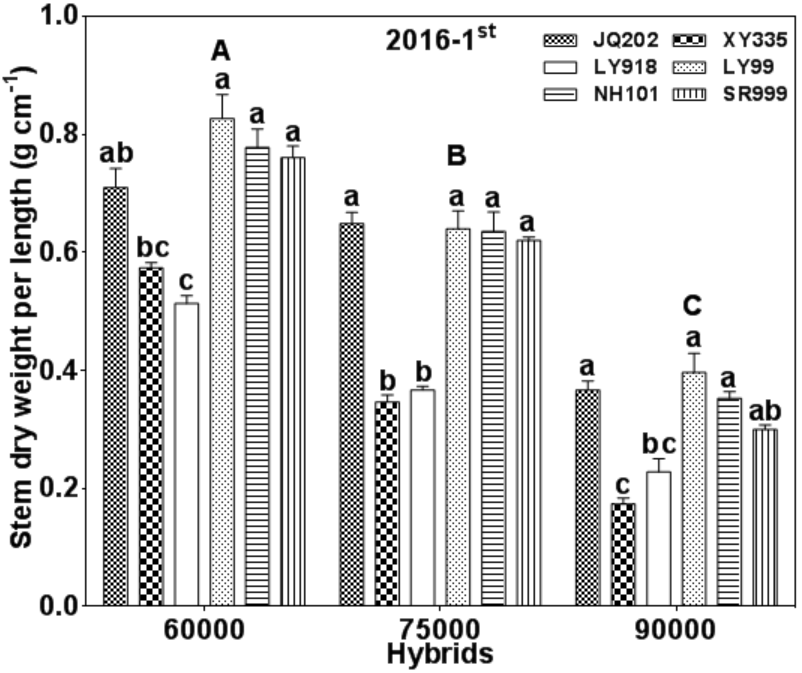

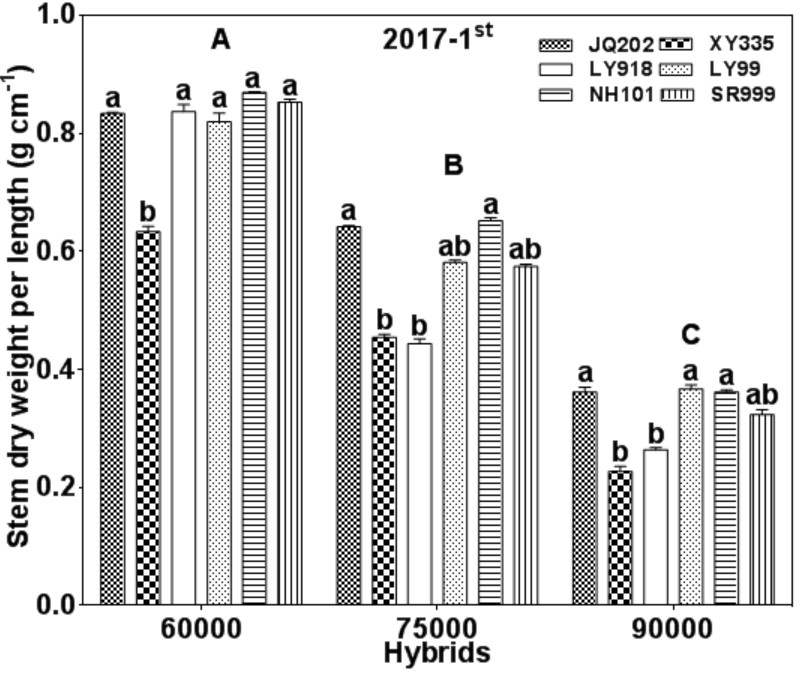


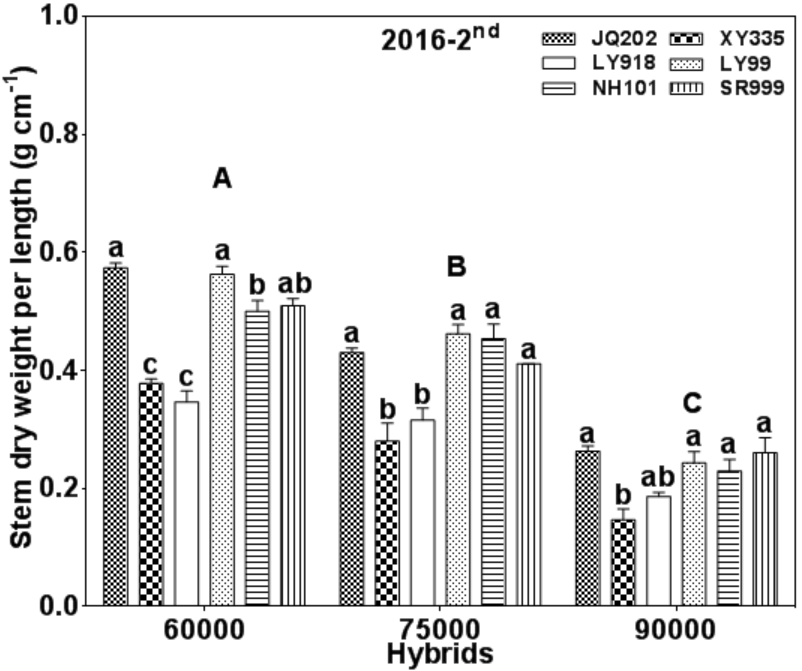

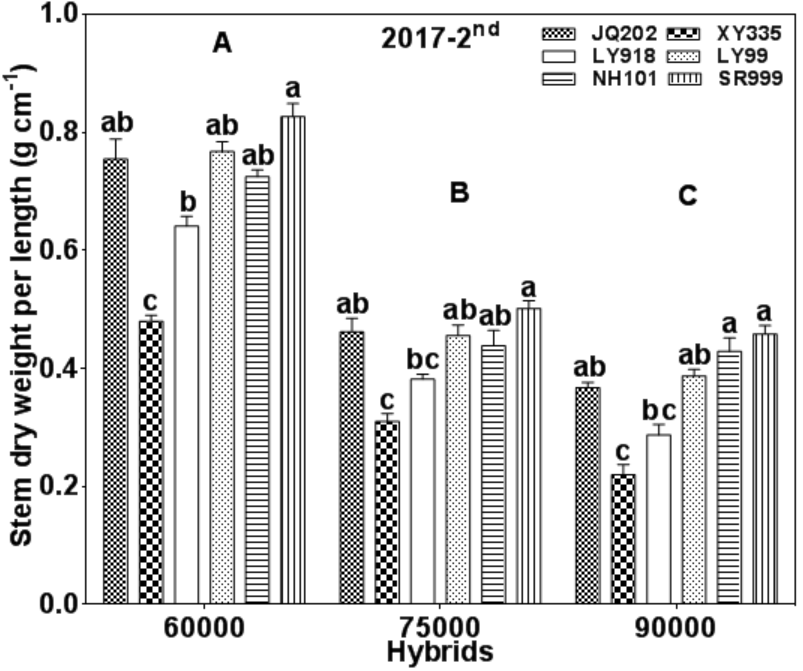


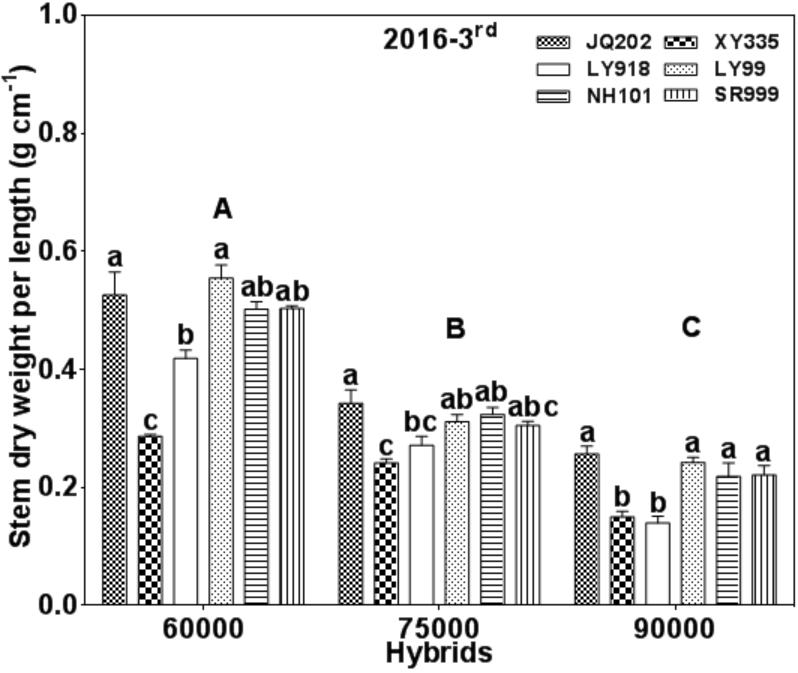

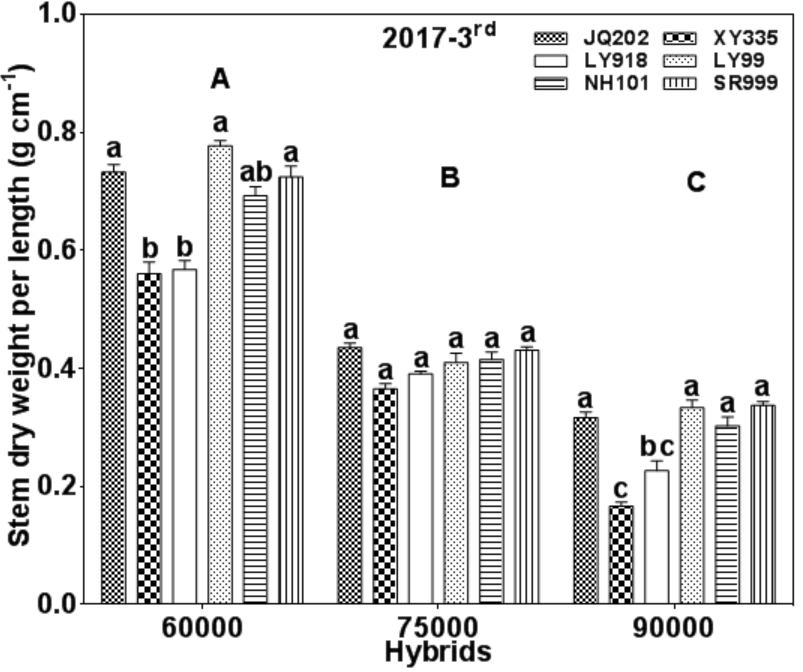


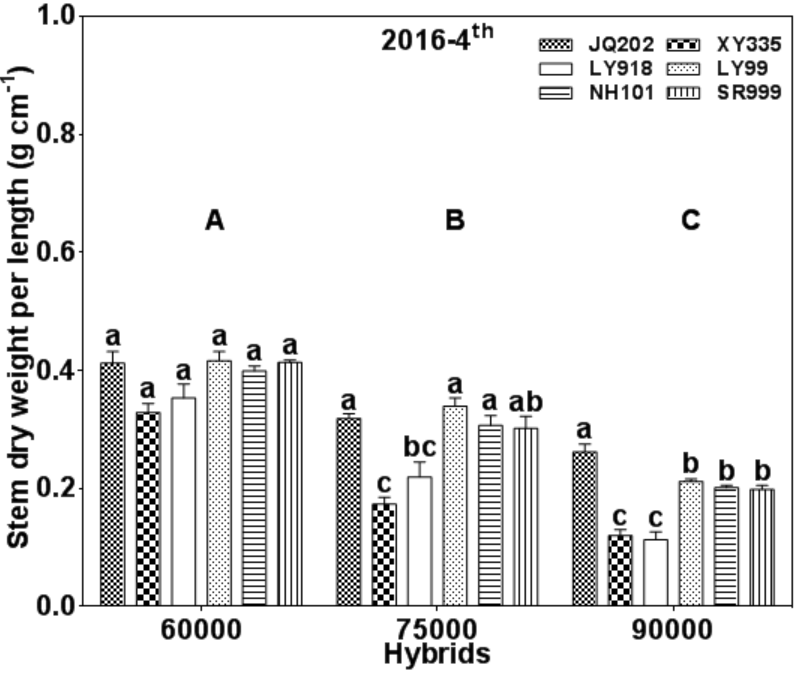

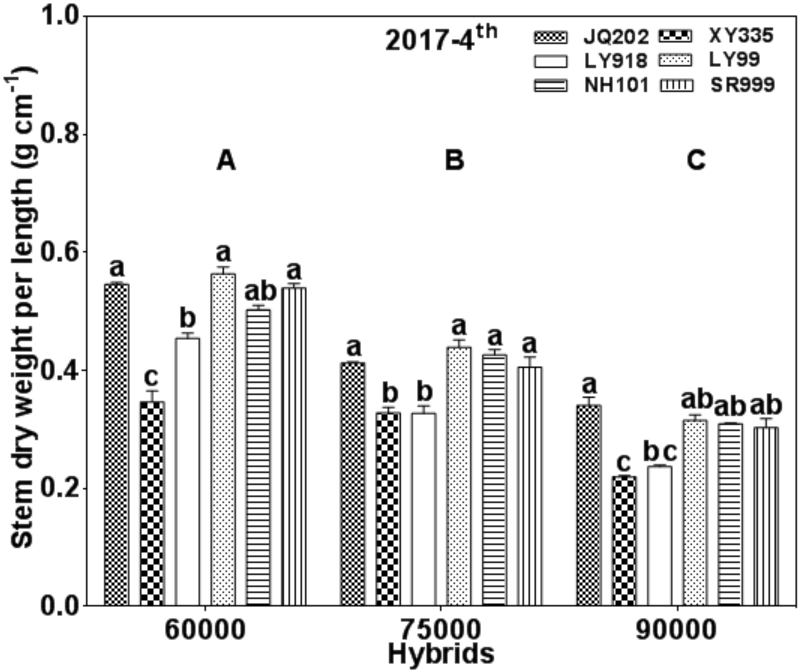


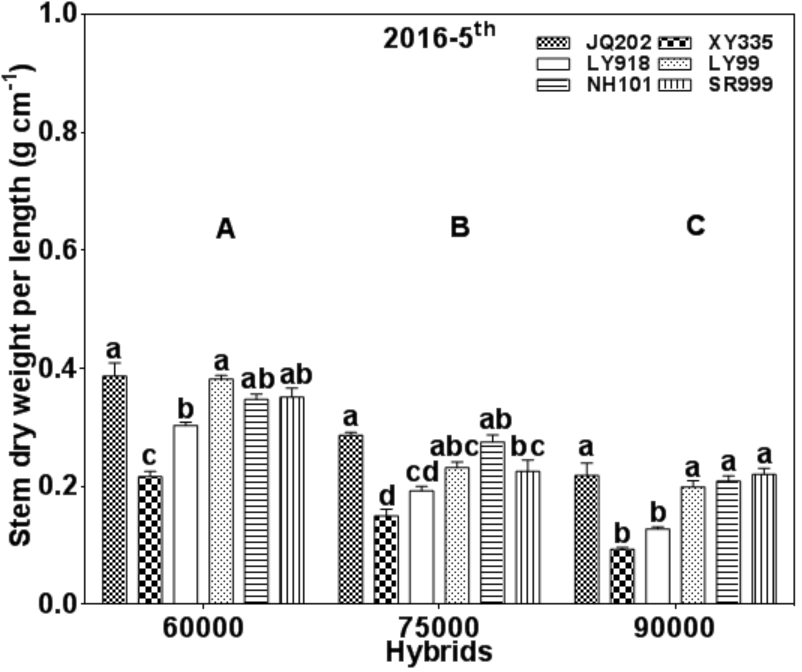

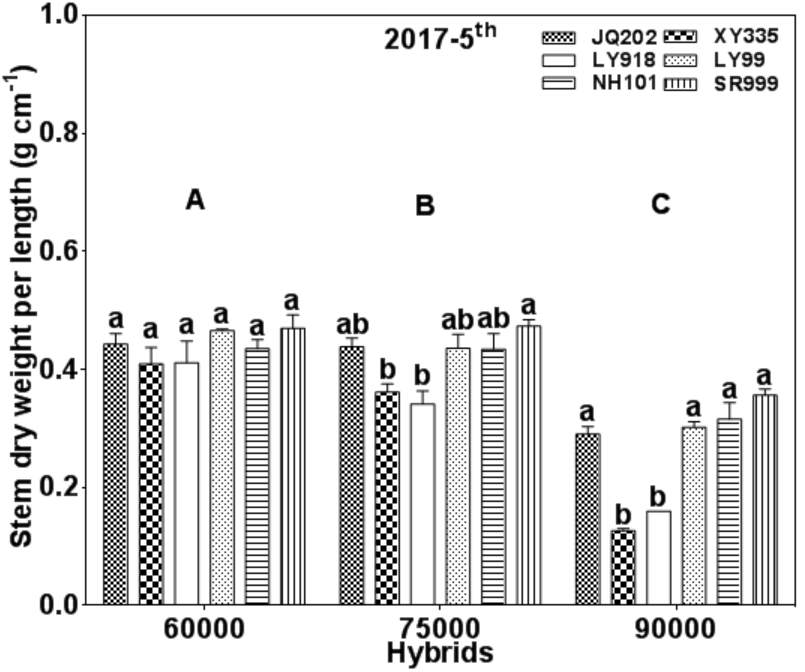


**Figure 2S**


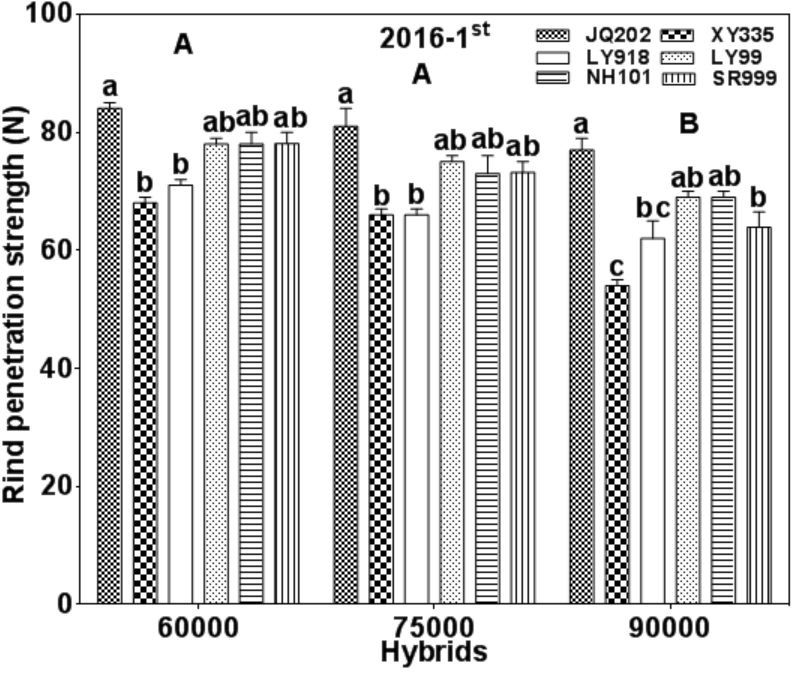

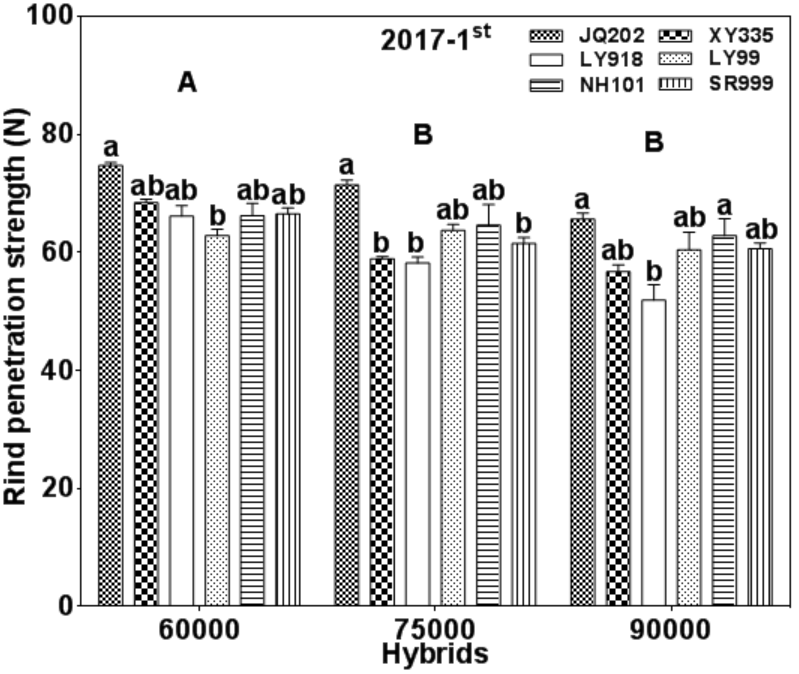


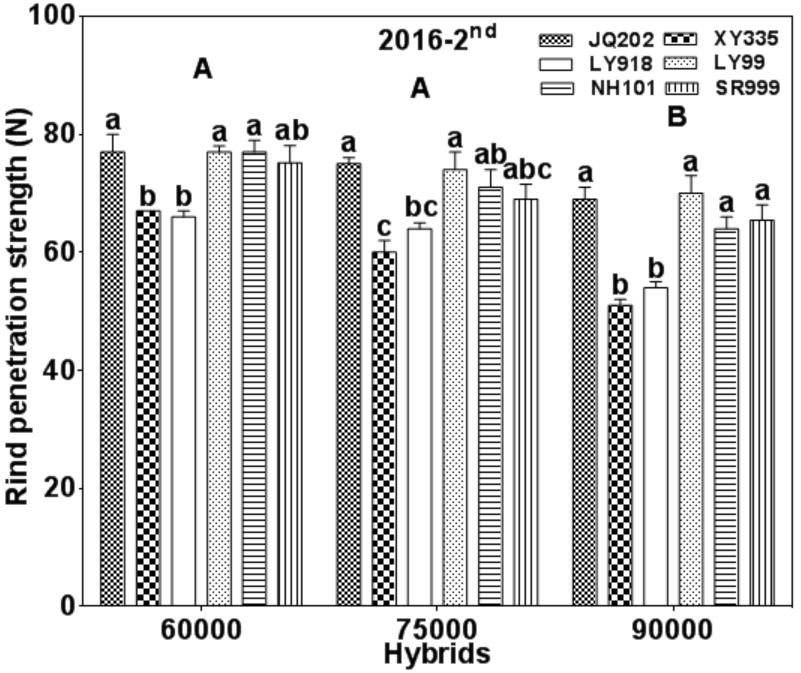

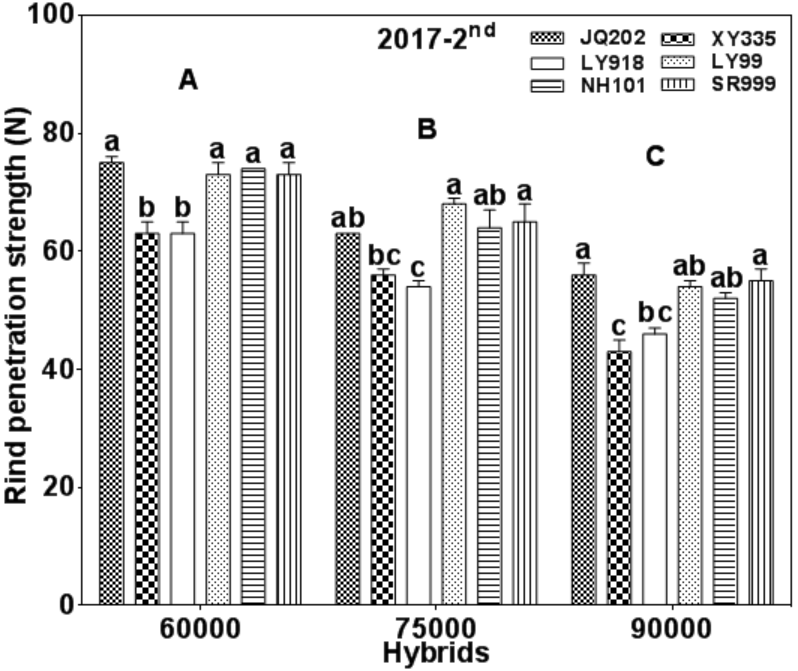


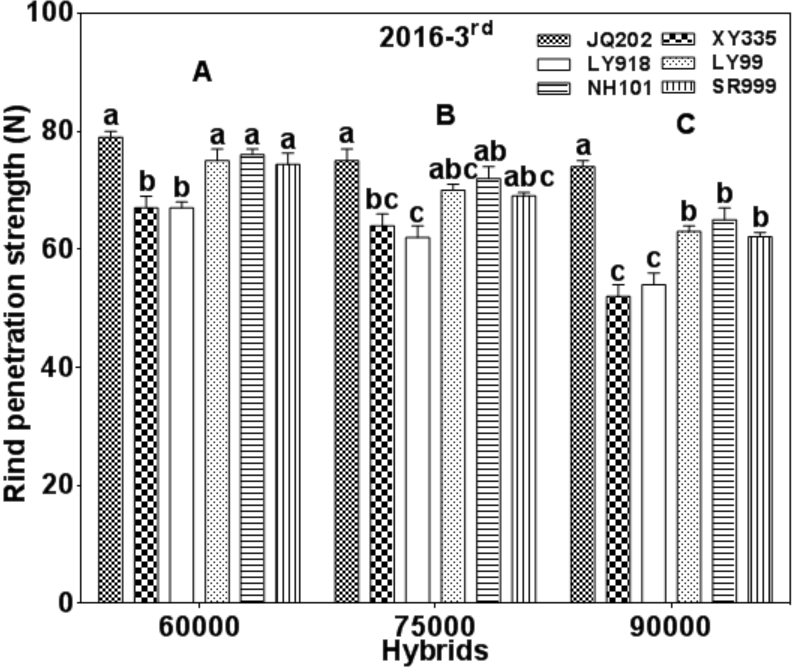

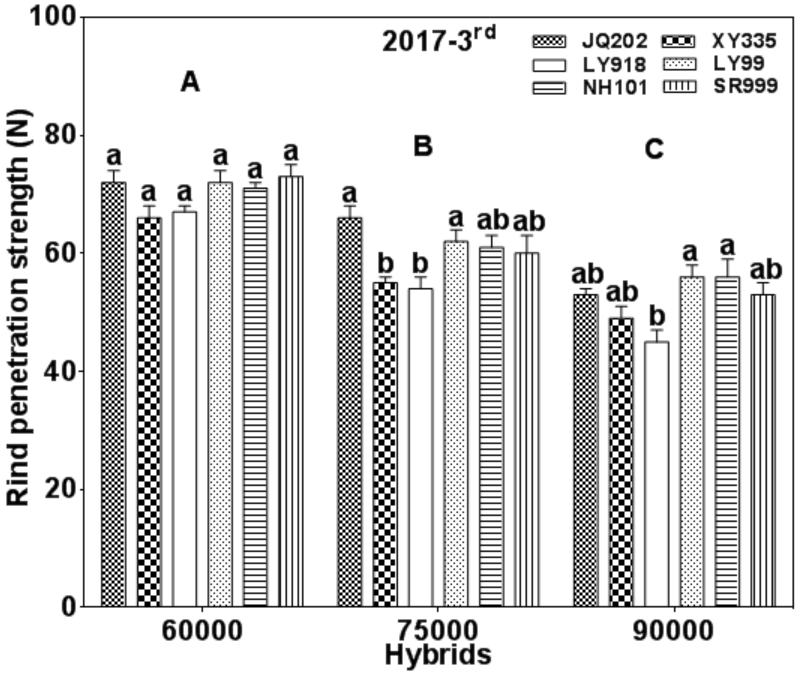


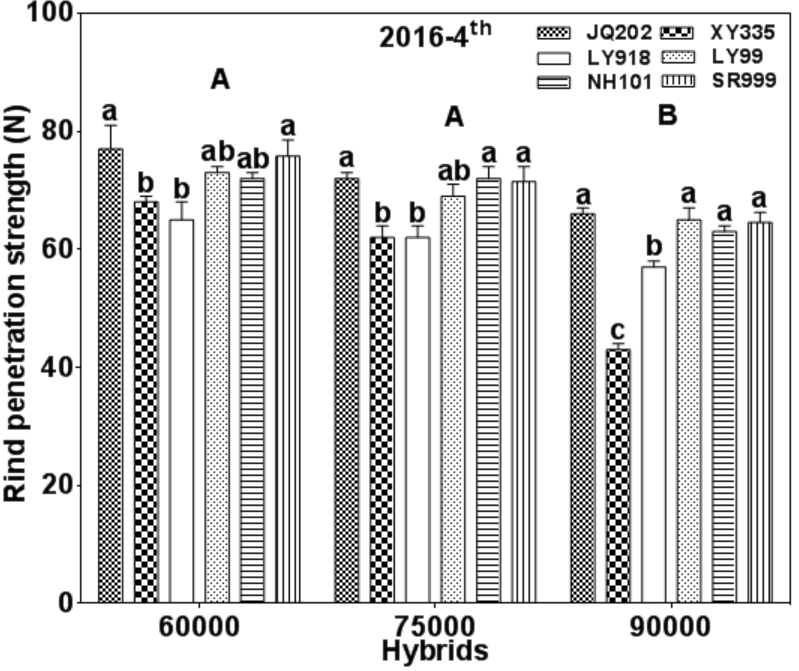

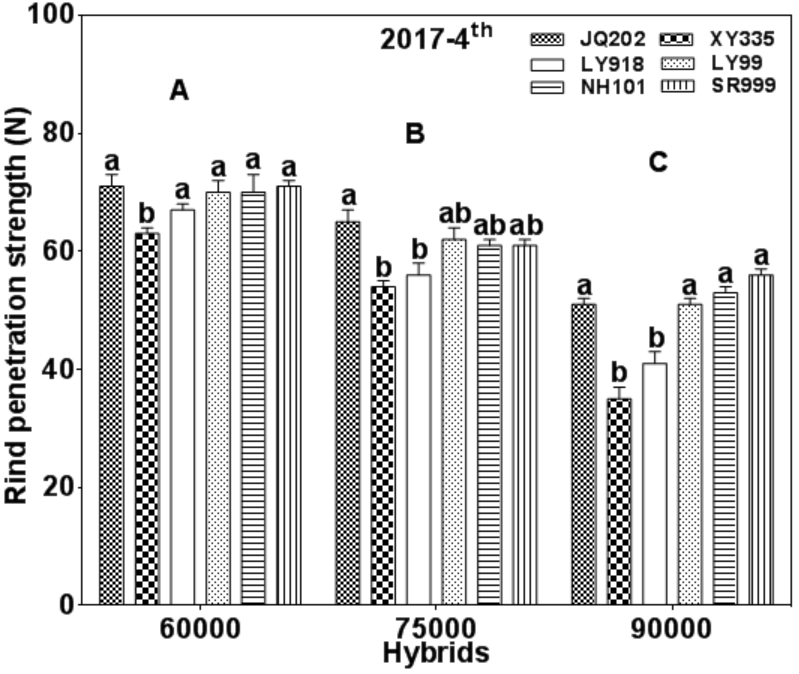


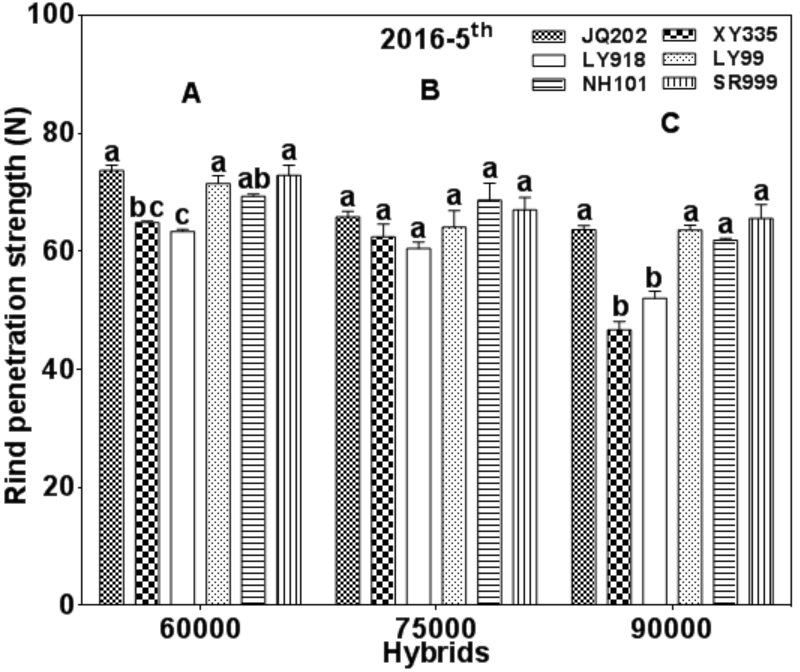

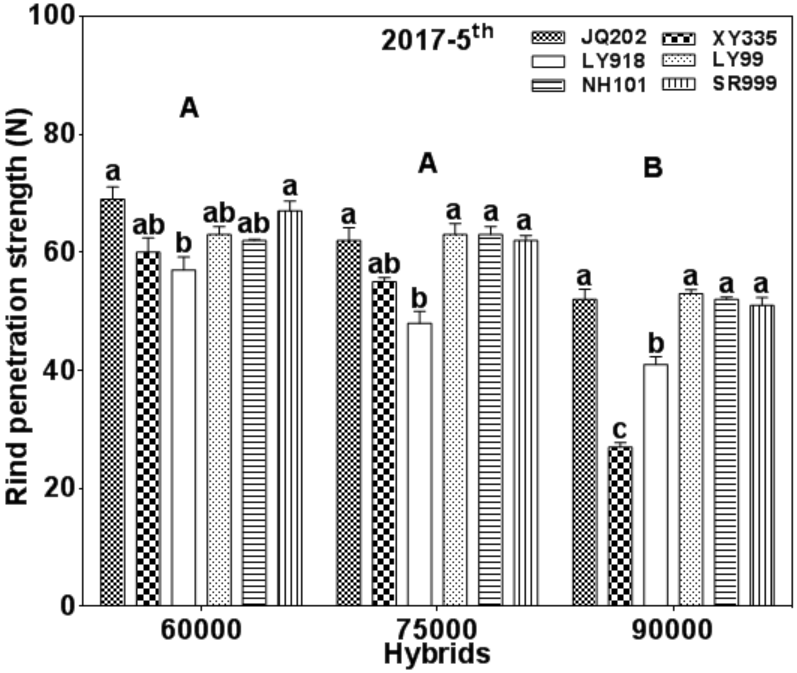


**Figure 3S**


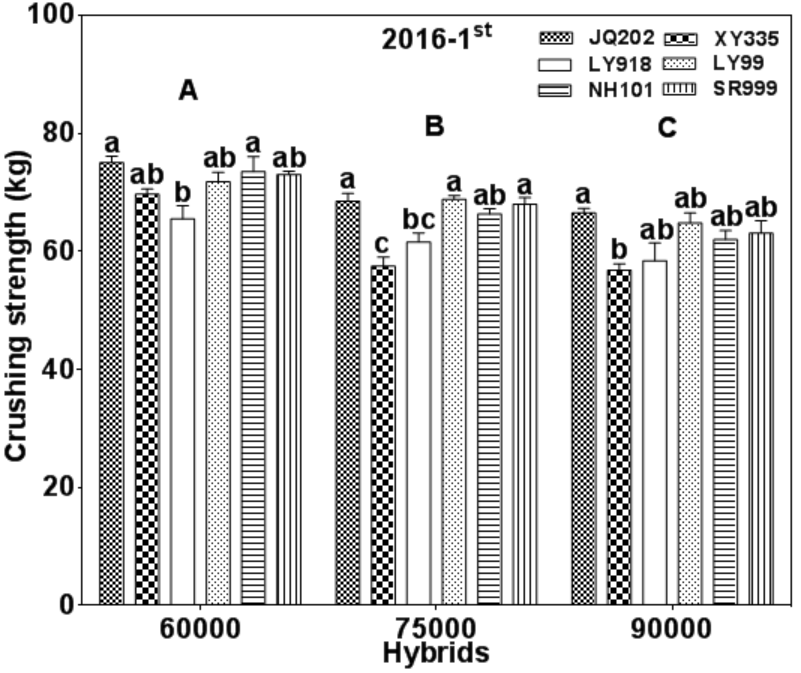

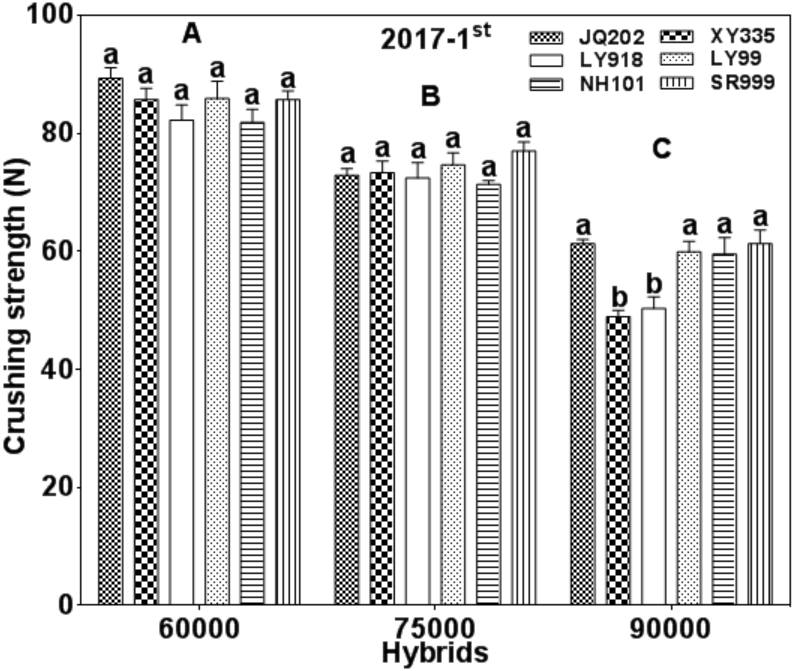


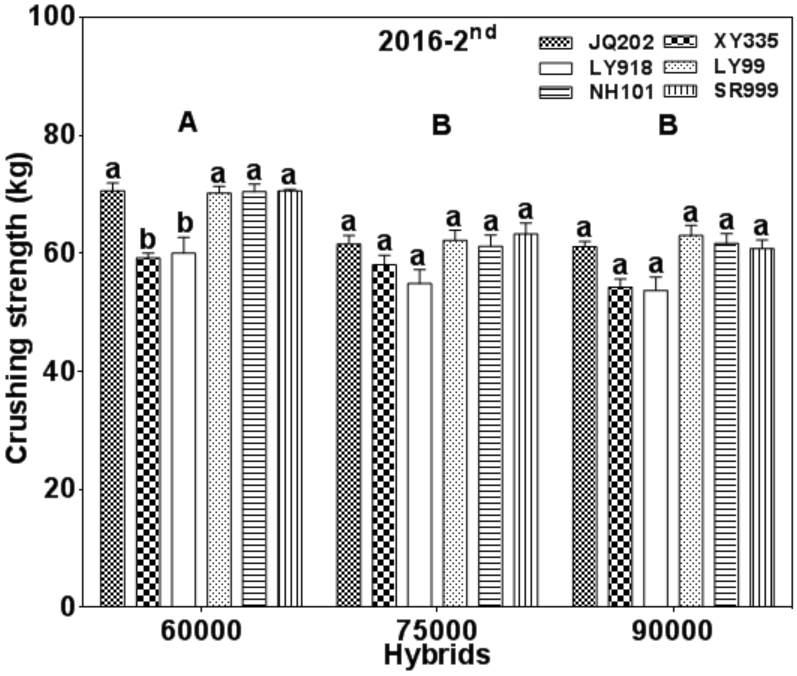

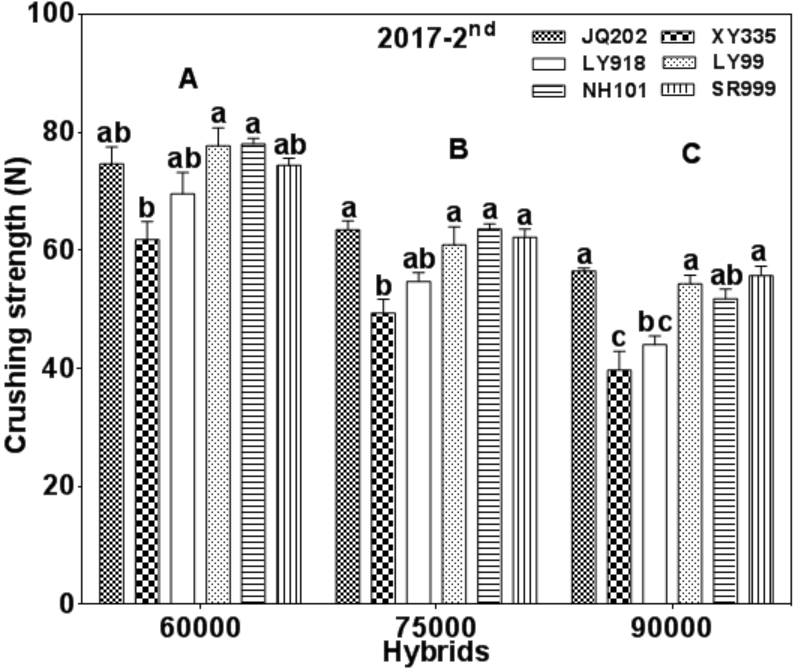


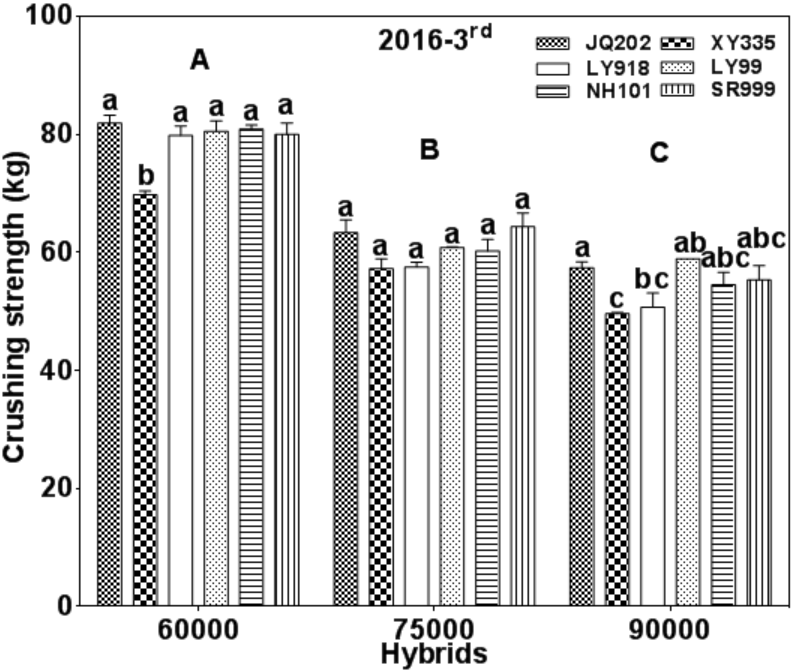

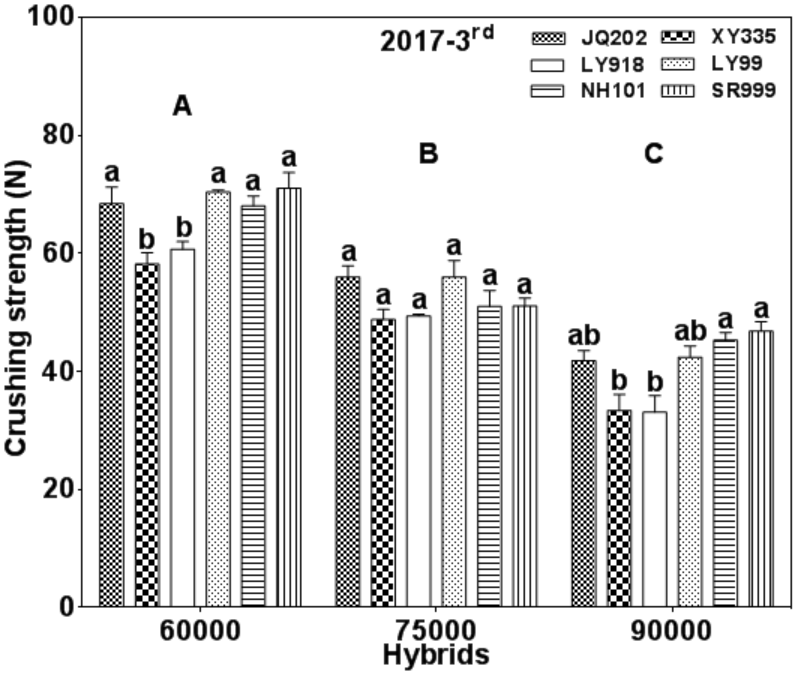


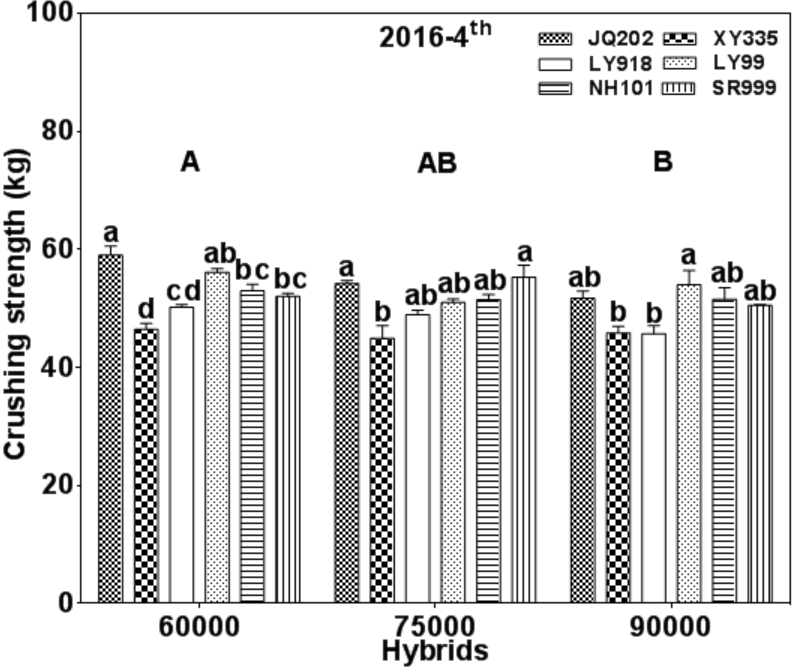

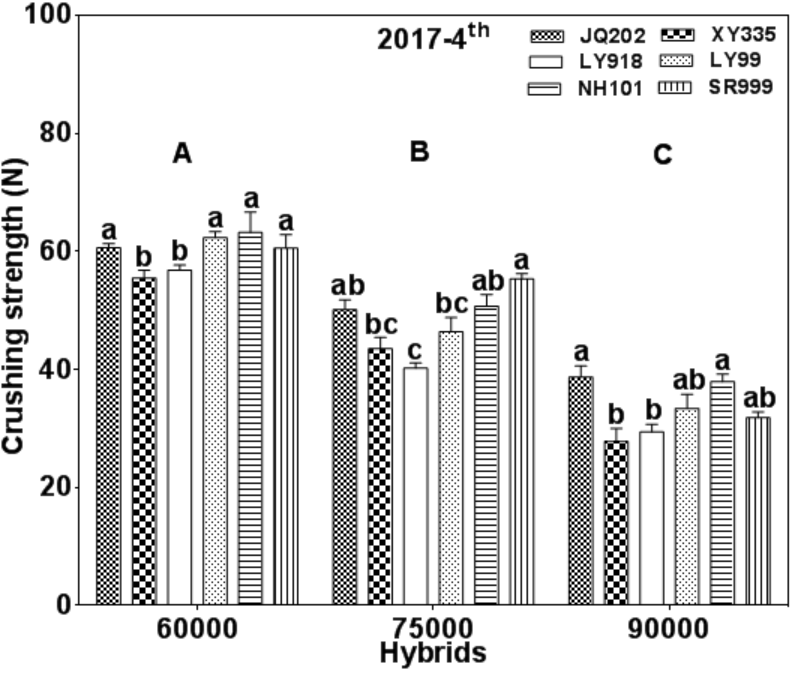


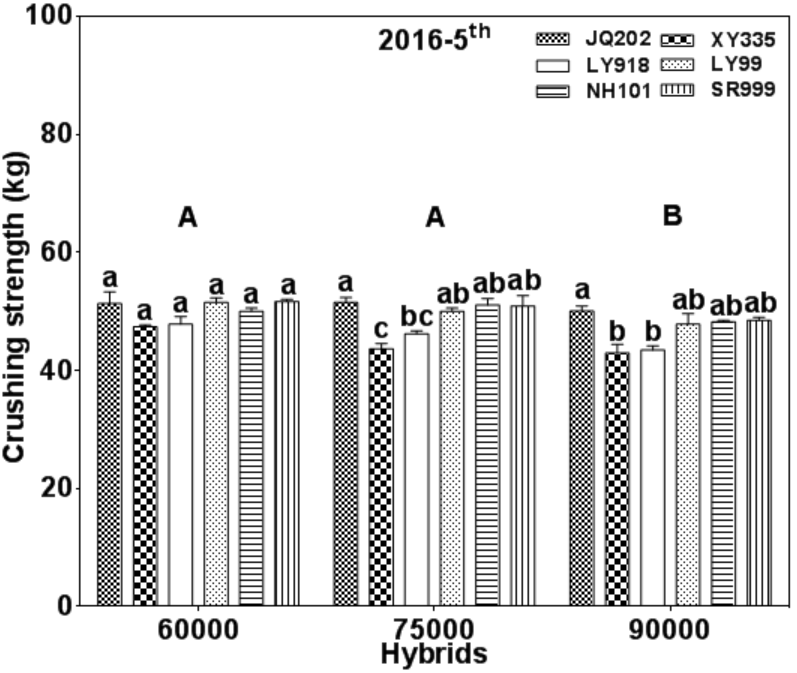

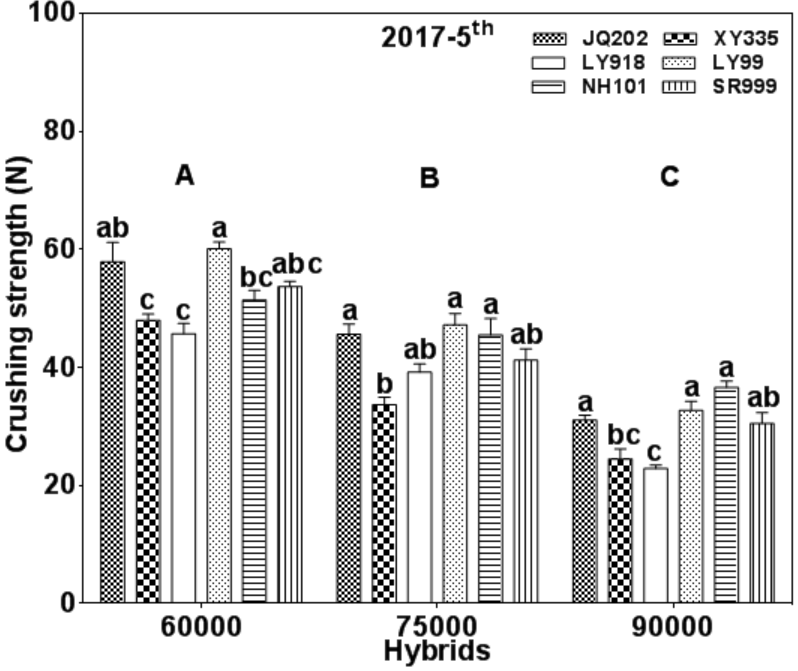


**Figure 4S**


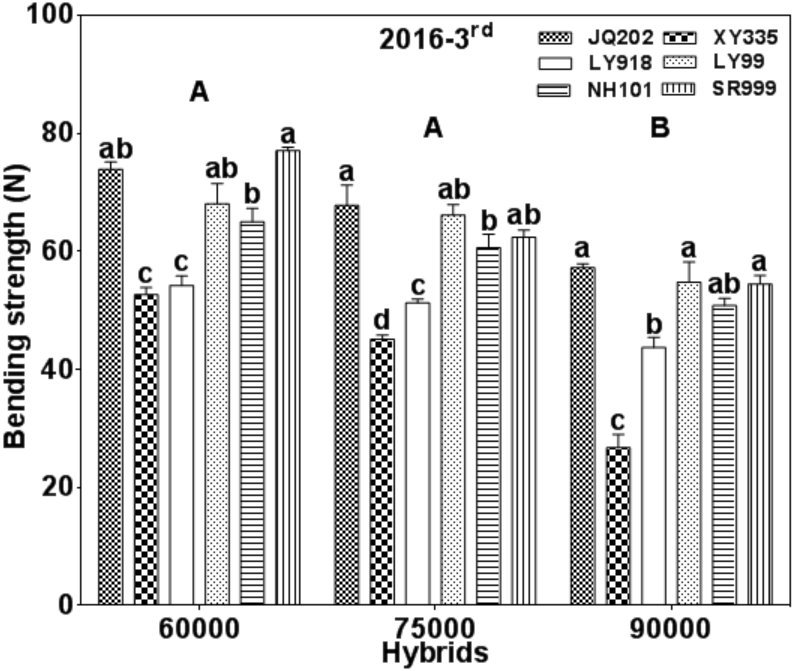

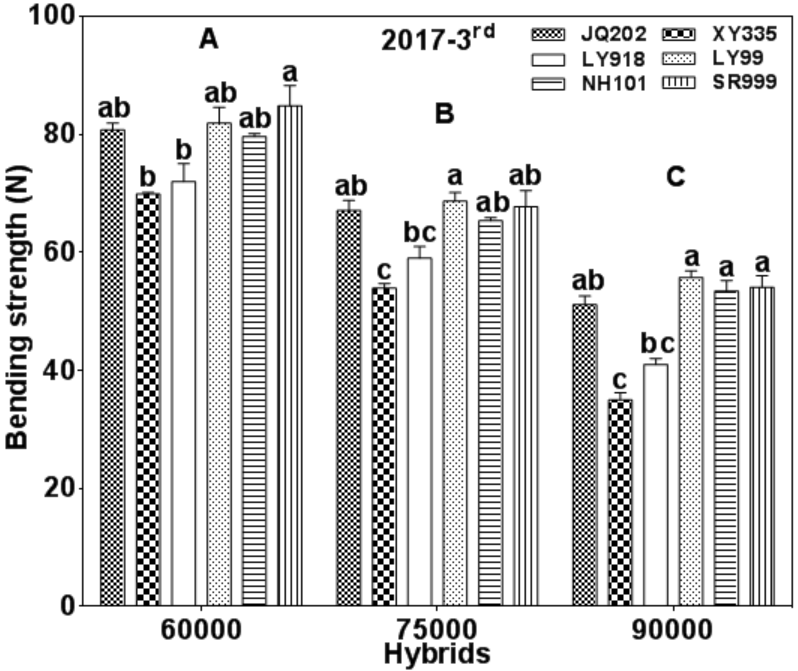


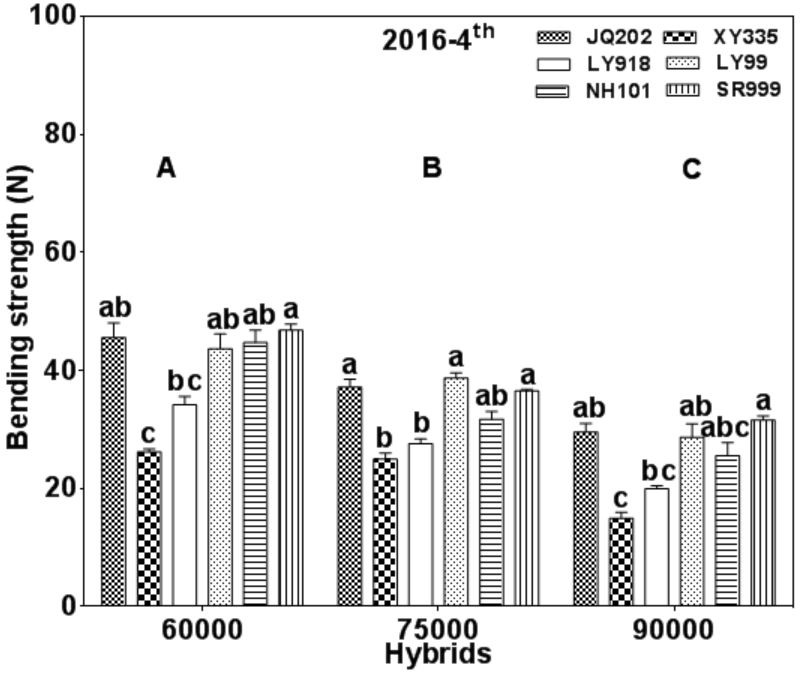

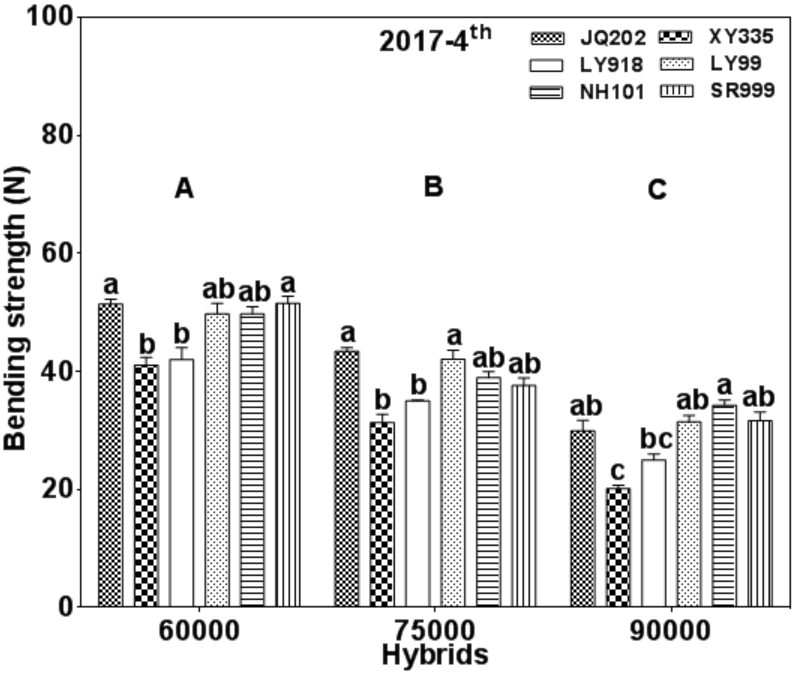


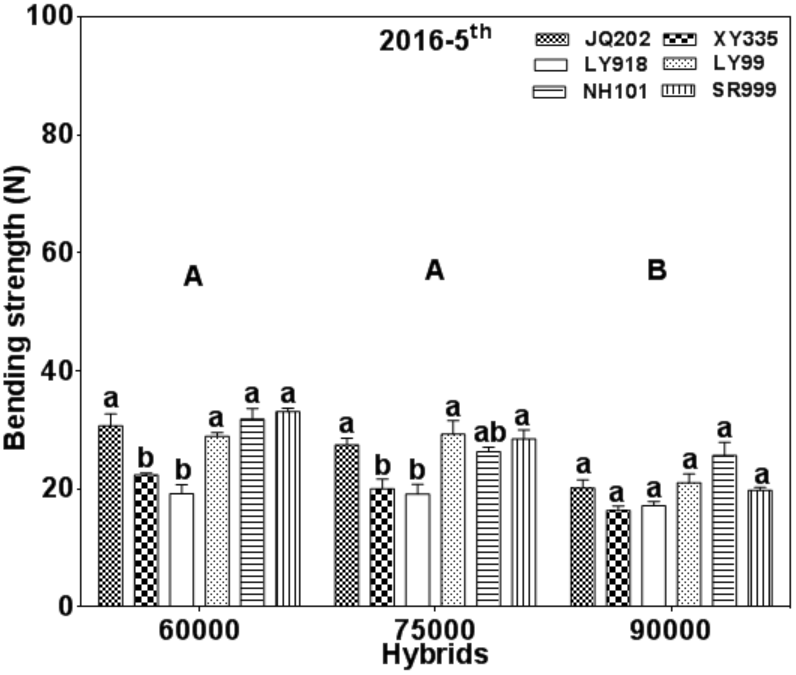

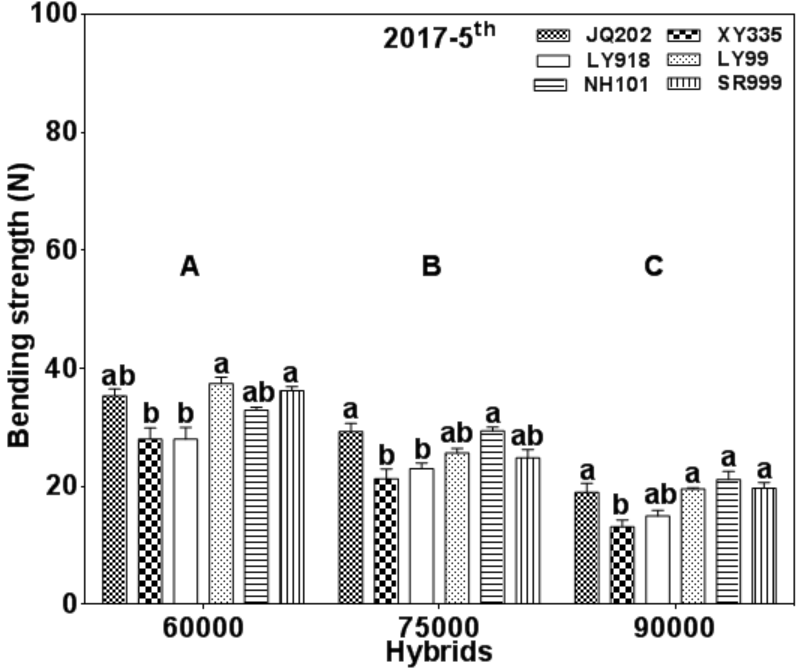


**Figure 5S**


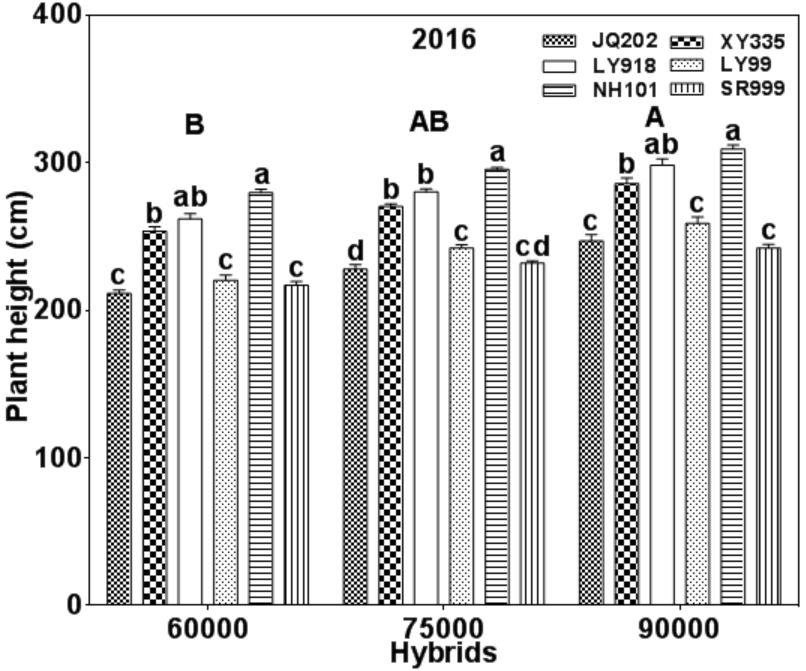

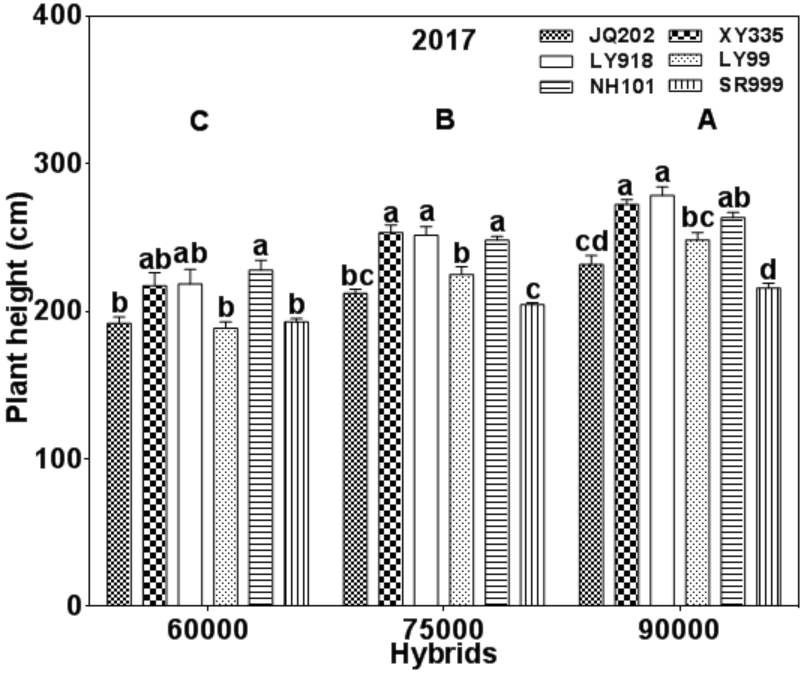


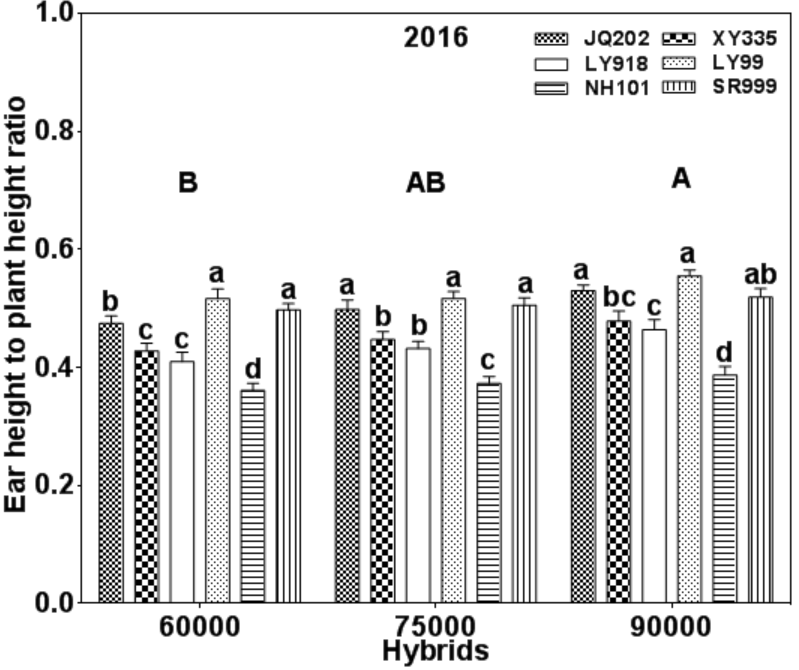

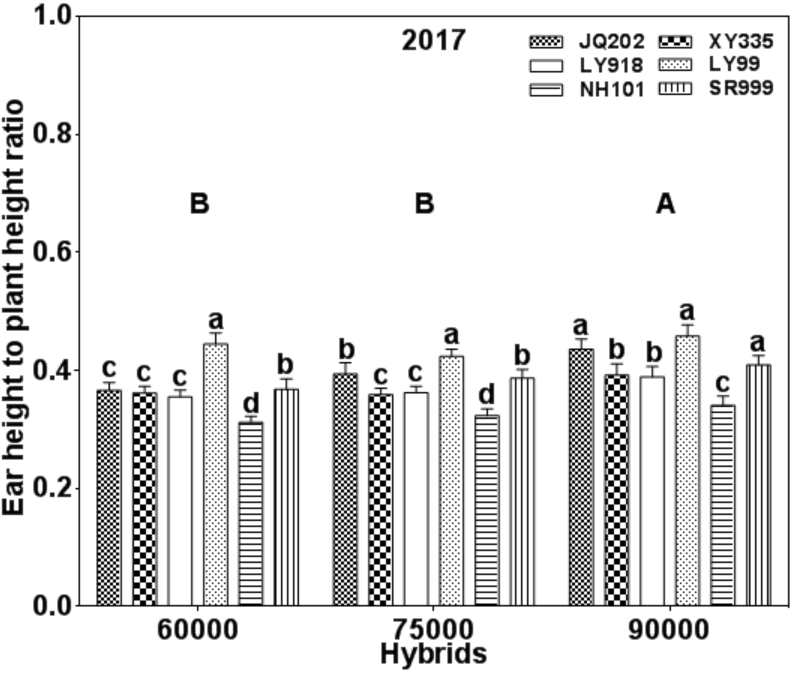


**Figure 6S**
